# Supplementary material for: Decisive Interactions between the Heterocyclic Moiety and the Cluster Observed in Polyoxometalate-Surfactant Hybrid Crystals
Source: Int J Mol Sci. 2015 Apr 16;16(4):8505–16. doi: 10.3390/ijms16048505 (PMC4425093; doi:10.3390/ijms16048505)
Supplement: Supplementary file 1 [file ijms-16-08505-s001.pdf]

# Supplementary Information

## Check Report of cif for 1 (C<sub>12</sub>pda-W<sub>10</sub>)

### CheckCIF/PLATON Report

You have not supplied any structure factors. As a result the full set of tests cannot be run.

THIS REPORT IS FOR GUIDANCE ONLY. IF USED AS PART OF A REVIEW PROCEDURE FOR PUBLICATION, IT SHOULD NOT REPLACE THE EXPERTISE OF AN EXPERIENCED CRYSTALLOGRAPHIC REFEREE.

No syntax errors found. CIF dictionary Interpreting this report

### Datablock: 140304

---

|                    |                                      |                                    |
|--------------------|--------------------------------------|------------------------------------|
| Bond precision:    | C-C = 0.0183 A                       | Wavelength=0.71075                 |
| Cell:              | a=10.55918 (19)                      | b=18.7700 (3) c=25.4318 (5)        |
|                    | alpha=74.4842 (7)                    | beta=86.5737 (7) gamma=85.6363 (7) |
| Temperature:       | 193 K                                |                                    |
|                    | Calculated                           | Reported                           |
| Volume             | 4838.63 (15)                         | 4838.62 (15)                       |
| Space group        | P -1                                 | P -1                               |
| Hall group         | -P 1                                 | -P 1                               |
| Moiety formula     | O32 W10, 4 (C16 H29 N2), 2 (C3 H6 O) | C70 H128 N8 O34 W10                |
| Sum formula        | C70 H128 N8 O34 W10                  | C70 H128 N8 O34 W10                |
| Mr                 | 3464.20                              | 3464.31                            |
| Dx,g cm-3          | 2.378                                | 2.378                              |
| Z                  | 2                                    | 2                                  |
| Mu (mm-1)          | 11.910                               | 11.924                             |
| F000               | 3232.0                               | 3232.0                             |
| F000'              | 3218.05                              |                                    |
| h,k,lmax           | 13,24,33                             | 13,24,33                           |
| Nref               | 22200                                | 22146                              |
| Tmin,Tmax          | 0.249,0.551                          | 0.139,0.551                        |
| Tmin'              | 0.001                                |                                    |
| Correction method= | MULTI-SCAN                           |                                    |
| Data completeness= | 0.998                                | Theta(max)= 27.490                 |
| R(reflections)=    | 0.0452 ( 17651)                      | wR2(reflections)= 0.1162 ( 22146)  |
| S =                | 1.034                                | Npar= 1106                         |

---

The following ALERTS were generated. Each ALERT has the format

**test-name\_ALERT\_alert-type\_alert-level**

Click on the hyperlinks for more details of the test.

**Alert level C**

```

PLAT220 ALERT 2 C Large Non-Solvent C Ueq(max)/Ueq(min) Range 3.9 Ratio
PLAT230 ALERT 2 C Hirshfeld Test Diff for N6 -- C33 .. 5.2 su
PLAT234 ALERT 4 C Large Hirshfeld Difference N5 -- N6 .. 0.19 Ang.
PLAT234 ALERT 4 C Large Hirshfeld Difference N7 -- N8 .. 0.18 Ang.
PLAT234 ALERT 4 C Large Hirshfeld Difference N7 -- C52 .. 16. Ang.
PLAT234 ALERT 4 C Large Hirshfeld Difference N8 -- C49 .. 17. Ang.
PLAT234 ALERT 4 C Large Hirshfeld Difference C51 -- C52 .. 0.20 Ang.
PLAT241 ALERT 2 C High Ueq as Compared to Neighbors for ..... N6 Check
PLAT241 ALERT 2 C High Ueq as Compared to Neighbors for ..... C47 Check
PLAT241 ALERT 2 C High Ueq as Compared to Neighbors for ..... N8 Check
PLAT241 ALERT 2 C High Ueq as Compared to Neighbors for ..... C55 Check
PLAT242 ALERT 2 C Low Ueq as Compared to Neighbors for ..... C33 Check
PLAT242 ALERT 2 C Low Ueq as Compared to Neighbors for ..... C46 Check
PLAT244 ALERT 4 C Low 'Solvent' Ueq as Compared to Neighbors of C66 Check
PLAT342 ALERT 3 C Low Bond Precision on C-C Bonds ..... 0.0183 Ang.
PLAT360 ALERT 2 C Short C(sp3)-C(sp3) Bond C44 - C45 ... 1.42 Ang.
PLAT362 ALERT 2 C Short C(sp3)-C(sp2) Bond C66 - C67 ... 1.40 Ang.
PLAT790 ALERT 4 C Centre of Gravity not Within Unit Cell: Resd. # 1 Note
O32 W10

```

**Alert level G**

```

CHEMS02 ALERT 1 G Please check that you have entered the correct
    _publ_requested_category classification of your compound;
    FI or CI or EI for inorganic; FM or CM or EM for metal-organic;
    FO or CO or EO for organic.
    From the CIF: _publ_requested_category CHOOSE FI FM FO CI CM CO or
    From the CIF: _chemical_formula_sum:C70 H128 N8 O34 W10
PLAT005 ALERT 5 G No _iucr_refine_instructions_details in the CIF Please Do !
PLAT042 ALERT 1 G Calc. and Reported MoietyFormula Strings Differ Please Check
PLAT083 ALERT 2 G SHELXL Second Parameter in WGHT Unusually Large. 23.11 Why ?
PLAT154 ALERT 1 G The su's on the Cell Angles are Equal ..... 0.00070 Degree
PLAT380 ALERT 4 G Incorrectly? Oriented X(sp2)-Methyl Moiety ..... C67 Check
PLAT432 ALERT 2 G Short Inter X...Y Contact O7 .. C50 .. 88. Ang.
PLAT432 ALERT 2 G Short Inter X...Y Contact O9 .. C3 .. 89. Ang.
PLAT432 ALERT 2 G Short Inter X...Y Contact O22 .. C49 .. 2.91 Ang.
PLAT432 ALERT 2 G Short Inter X...Y Contact O24 .. C4 .. 2.89 Ang.
PLAT432 ALERT 2 G Short Inter X...Y Contact O25 .. C17 .. 2.89 Ang.
PLAT790 ALERT 4 G Centre of Gravity not Within Unit Cell: Resd. # 5 Note
C16 H29 N2
PLAT790 ALERT 4 G Centre of Gravity not Within Unit Cell: Resd. # 8 Note
C3 H6 O

```

- 0 **ALERT level A** = Most likely a serious problem - resolve or explain  
0 **ALERT level B** = A potentially serious problem, consider carefully  
18 **ALERT level C** = Check. Ensure it is not caused by an omission or oversight  
13 **ALERT level G** = General information/check it is not something unexpected
- 3 **ALERT type 1** CIF construction/syntax error, inconsistent or missing data  
16 **ALERT type 2** Indicator that the structure model may be wrong or deficient  
1 **ALERT type 3** Indicator that the structure quality may be low  
10 **ALERT type 4** Improvement, methodology, query or suggestion  
1 **ALERT type 5** Informative message, check

**Check report of cif for 2 (C<sub>12</sub>py-W<sub>10</sub>)****CheckCIF/PLATON Report**

You have not supplied any structure factors. As a result the full set of tests cannot be run.

THIS REPORT IS FOR GUIDANCE ONLY. IF USED AS PART OF A REVIEW PROCEDURE FOR PUBLICATION, IT SHOULD NOT REPLACE THE EXPERTISE OF AN EXPERIENCED CRYSTALLOGRAPHIC REFEREE.

No syntax errors found. CIF dictionary Interpreting this report

**Datablock: TObteSaturn4**


---

Bond precision: C-C = 0.0419 A                      Wavelength=0.71075

Cell:                      a=10.813 (7)                      b=11.339 (7)                      c=23.610 (13)

                            alpha=99.415 (9)                      beta=91.558 (5)                      gamma=115.588 (9)

Temperature:            173 K

|                        | Calculated                          | Reported            |
|------------------------|-------------------------------------|---------------------|
| Volume                 | 2560 (3)                            | 2560 (3)            |
| Space group            | P -1                                | P -1                |
| Hall group             | -P 1                                | -P 1                |
| Moiety formula         | O32 W10, 4 (C17 H30 N), 4 (C2 H6 O) | C76 H140 N4 O36 W10 |
| Sum formula            | C76 H144 N4 O36 W10                 | C76 H140 N4 O36 W10 |
| Mr                     | 3528.35                             | 3524.45             |
| Dx, g cm <sup>-3</sup> | 2.289                               | 2.286               |
| Z                      | 1                                   | 1                   |
| Mu (mm <sup>-1</sup> ) | 11.258                              | 11.272              |
| F000                   | 1656.0                              | 1652.0              |
| F000'                  | 1649.02                             |                     |
| h, k, lmax             | 15, 16, 34                          | 15, 16, 34          |
| Nref                   | 17033                               | 11774               |
| Tmin, Tmax             | 0.131, 0.105                        | 0.046, 0.105        |
| Tmin'                  | 0.084                               |                     |

Correction method= MULTI-SCAN

Data completeness= 0.691                      Theta(max)= 31.493

R(reflections)= 0.0983 ( 8235)                      wR2(reflections)= 0.3237 ( 11774)

S = 1.058                      Npar= 563

---

The following ALERTS were generated. Each ALERT has the format

test-name\_ALERT\_alert-type\_alert-level

Click on the hyperlinks for more details of the test.

**Alert level A**

PLAT029 ALERT 3 A \_diffn\_measured\_fraction\_theta\_full Low ..... 0.812 Note

**Author Response: ...This structure intrinsically exhibits many weak reflections at higher theta values. The submitted manuscript mainly reports the packing mode of the decatungstate anions and pyridinium cations. The data obtained had insufficient quality, but was sufficient to elucidate the packing feature of the decatungstate anion and heterocyclic moiety.**

**Alert level B**

PLAT342 ALERT 3 B Low Bond Precision on C-C Bonds ..... 0.0419 Ang.

**Alert level C**

DIFMN02 ALERT 2 C The minimum difference density is  $< -0.1 \times Z_{\text{MAX}} \times 0.75$   
 \_refine\_diff\_density\_min given = -6.420  
 Test value = -5.550

DIFMN03 ALERT 1 C The minimum difference density is  $< -0.1 \times Z_{\text{MAX}} \times 0.75$   
 The relevant atom site should be identified.

RFACR01 ALERT 3 C The value of the weighted R factor is  $> 0.25$   
 Weighted R factor given 0.324

RINTA01 ALERT 3 C The value of Rint is greater than 0.12  
 Rint given 0.138

PLAT020 ALERT 3 C The value of Rint is greater than 0.12 ..... 0.138 Report

PLAT041 ALERT 1 C Calc. and Reported SumFormula Strings Differ Please Check

PLAT043 ALERT 1 C Calculated and Reported Mol. Weight Differ by .. 3.90 Check

PLAT068 ALERT 1 C Reported F000 Differs from Calcd (or Missing)... Please Check

PLAT084 ALERT 3 C High wR2 Value (i.e.  $> 0.25$ ) ..... 0.32 Report

PLAT098 ALERT 2 C Large Reported Min. (Negative) Residual Density -6.42 eA-3

PLAT202 ALERT 3 C Isotropic non-H Atoms in Anion/Solvent ..... 1

PLAT213 ALERT 2 C Atom O1 has ADP max/min Ratio ..... 3.1 oblate

PLAT213 ALERT 2 C Atom C1 has ADP max/min Ratio ..... 3.8 prolat

PLAT213 ALERT 2 C Atom C10 has ADP max/min Ratio ..... 3.7 prolat

PLAT213 ALERT 2 C Atom C14 has ADP max/min Ratio ..... 3.4 oblate

PLAT213 ALERT 2 C Atom C15 has ADP max/min Ratio ..... 3.4 prolat

PLAT213 ALERT 2 C Atom C18 has ADP max/min Ratio ..... 3.2 oblate

PLAT220 ALERT 2 C Large Non-Solvent C Ueq(max)/Ueq(min) Range 3.1 Ratio

PLAT230 ALERT 2 C Hirshfeld Test Diff for C1 -- C2 .. 6.0 su

PLAT234 ALERT 4 C Large Hirshfeld Difference W1 -- O1 .. 0.18 Ang.

PLAT234 ALERT 4 C Large Hirshfeld Difference W3 -- O11 .. 0.16 Ang.

PLAT234 ALERT 4 C Large Hirshfeld Difference C3 -- C4 .. 0.20 Ang.

PLAT234 ALERT 4 C Large Hirshfeld Difference C8 -- C9 .. 0.19 Ang.

PLAT241 ALERT 2 C High Ueq as Compared to Neighbors for ..... C1 Check

PLAT242 ALERT 2 C Low Ueq as Compared to Neighbors for ..... C2 Check

PLAT242 ALERT 2 C Low Ueq as Compared to Neighbors for ..... C32 Check

PLAT244 ALERT 4 C Low 'Solvent' Ueq as Compared to Neighbors of C35 Check

PLAT244 ALERT 4 C Low 'Solvent' Ueq as Compared to Neighbors of C37 Check

PLAT250 ALERT 2 C Large U3/U1 Ratio for Average U(i,j) Tensor .... 2.4 Note

PLAT360 ALERT 2 C Short C(sp3)-C(sp3) Bond C33 - C34 ... 1.36 Ang.

PLAT360 ALERT 2 C Short C(sp3)-C(sp3) Bond C37 - C38 ... 1.38 Ang.

PLAT361 ALERT 2 C Long C(sp3)-C(sp3) Bond C29 - C30 ... 1.67 Ang.

PLAT415 ALERT 2 C Short Inter D-H...H-X H18E .. H23A .. 2.10 Ang.

---

**Alert level G**

FORMU01 ALERT 2 G There is a discrepancy between the atom counts in the  
     `_chemical_formula_sum` and the formula from the `_atom_site*` data.  
     Atom count from `_chemical_formula_sum`: C76 H140 N4 O36 W10  
     Atom count from the `_atom_site` data: C76 H144 N4 O36 W10

CELLZ01 ALERT 1 G Difference between formula and atom\_site contents detected.

CELLZ01 ALERT 1 G ALERT: Large difference may be due to a

    symmetry error - see SYMMG tests  
     From the CIF: `_cell_formula_units_Z` 1  
     From the CIF: `_chemical_formula_sum` C76 H140 N4 O36 W10  
     TEST: Compare cell contents of formula and atom\_site data

| atom | Z*formula | cif sites | diff  |
|------|-----------|-----------|-------|
| C    | 76.00     | 76.00     | 0.00  |
| H    | 140.00    | 144.00    | -4.00 |
| N    | 4.00      | 4.00      | 0.00  |
| O    | 36.00     | 36.00     | 0.00  |
| W    | 10.00     | 10.00     | 0.00  |

CHEMS02 ALERT 1 G Please check that you have entered the correct

`_publ_requested_category` classification of your compound;  
     FI or CI or EI for inorganic; FM or CM or EM for metal-organic;  
     FO or CO or EO for organic.

    From the CIF: `_publ_requested_category` CHOOSE FI FM FO CI CM CO or  
     From the CIF: `_chemical_formula_sum`: C76 H140 N4 O36 W10

PLAT005 ALERT 5 G No `_iucr_refine_instructions_details` in the CIF Please Do !

PLAT007 ALERT 5 G Number of Unrefined Donor-H Atoms ..... 2 Report

PLAT042 ALERT 1 G Calc. and Reported MoietyFormula Strings Differ Please Check

PLAT072 ALERT 2 G SHELXL First Parameter in WGHT Unusually Large. 0.20 Report

PLAT432 ALERT 2 G Short Inter X...Y Contact O9 .. C18 .. 2.99 Ang.

---

1 **ALERT level A** = Most likely a serious problem - resolve or explain

1 **ALERT level B** = A potentially serious problem, consider carefully

33 **ALERT level C** = Check. Ensure it is not caused by an omission or oversight

9 **ALERT level G** = General information/check it is not something unexpected

8 ALERT type 1 CIF construction/syntax error, inconsistent or missing data

21 ALERT type 2 Indicator that the structure model may be wrong or deficient

7 ALERT type 3 Indicator that the structure quality may be low

6 ALERT type 4 Improvement, methodology, query or suggestion

2 ALERT type 5 Informative message, check

---
